# Supplementary material for: Ligand effect on controlling the synthesis of branched gold nanomaterials against fusarium wilt diseases
Source: Royal Society of Chemistry journal article supplement (doi:10.1039/d2ra05478g), 2022-01-01
Supplement: d2ra05478g1.pdf [file d2ra05478g1.pdf]

Supporting Information

# **Ligand Effect on Controlling the Synthesis of Branched Gold Nanomaterials Against Fusarium Wilt Diseases**

*Francis J. Osonga, Gaddi B. Eshun & Omowunmi A. Sadik \**

BioSensor Materials for Advanced Research and Technology (The BioSMART Center),  
Chemistry and Environmental Science Department, New Jersey Institute of Technology,  
University Heights, 161 Warren Street, Newark, NJ 07102

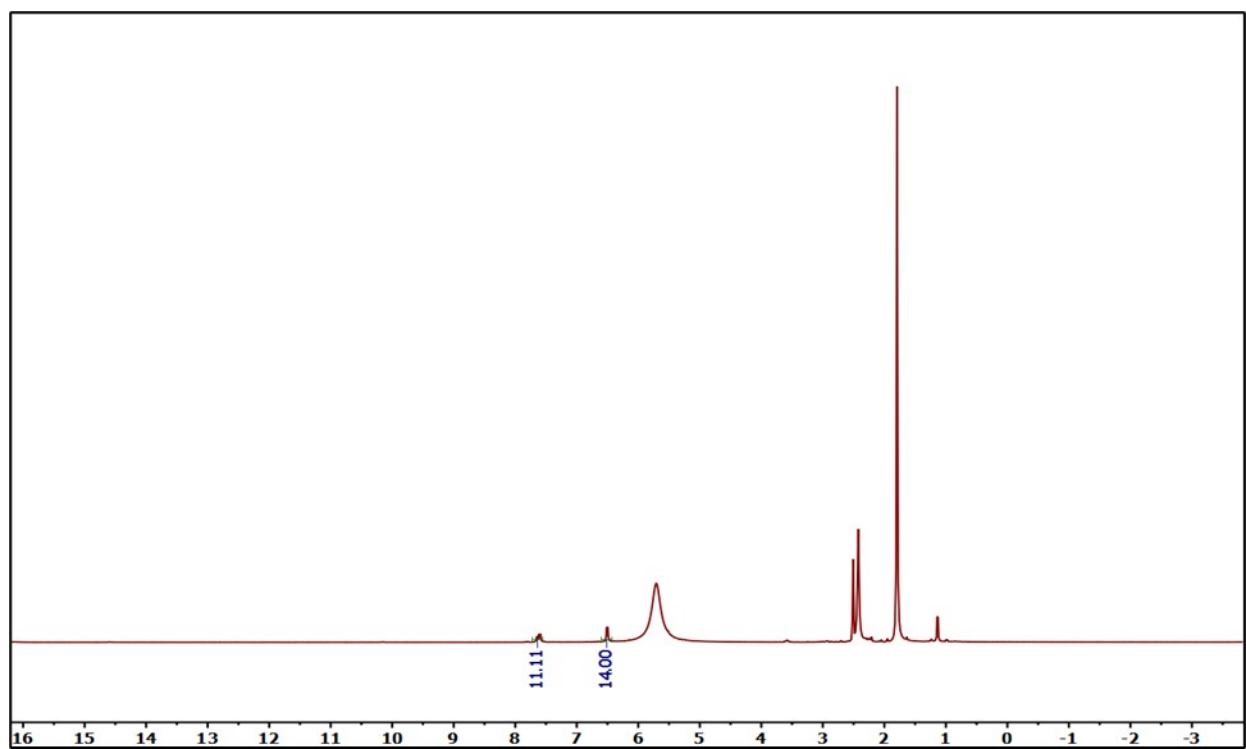

**Figure S1:**  $^1\text{H}$ -NMR spectrum of Quercetin-Para aminobenzoic acid

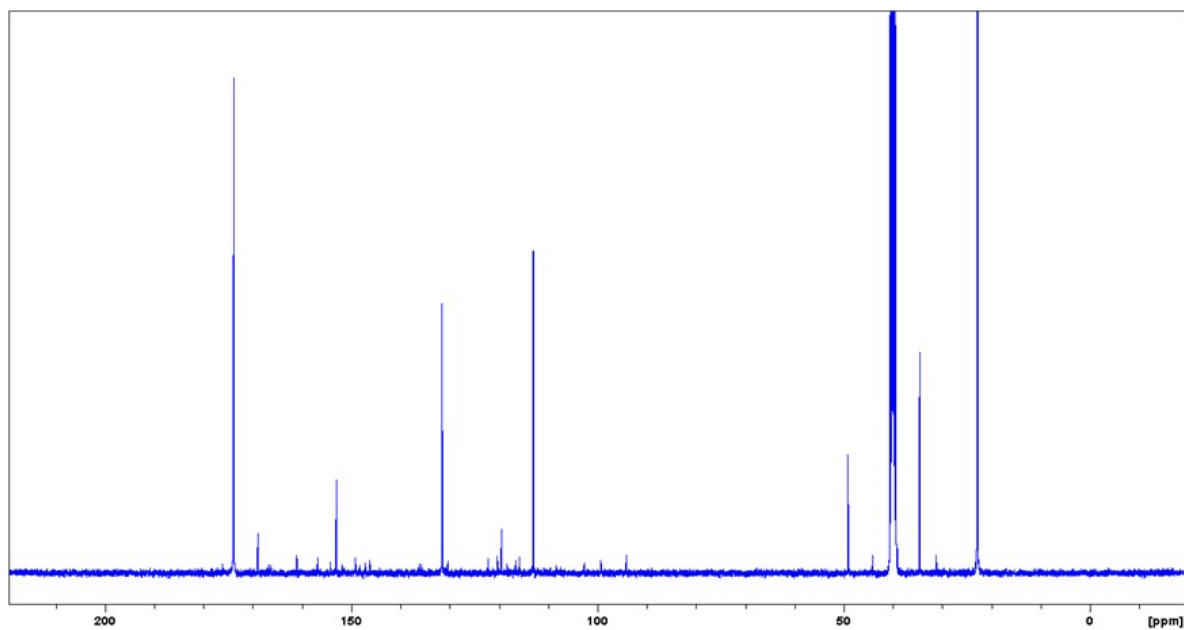

**Figure S2:** <sup>13</sup>C-NMR Spectrum of Quercetin Para aminobenzoic acid. (QPABA)

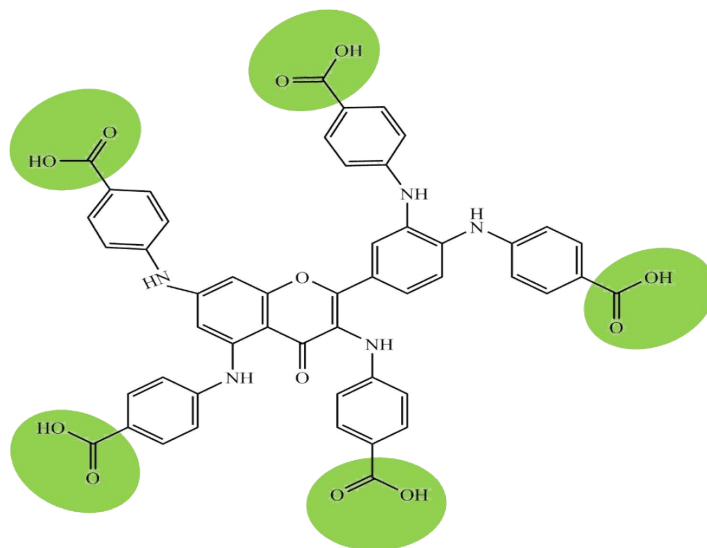

**Scheme: S1** Schematic representation of QPABA and showing -NH and -COOH groups for intramolecular hydrogen bonding

**Table S1:** Time-varying experiment shows 11 samples between 30 sec to 1hr reaction time. Constant concentrations throughout using a 4:1 ratio of reagents

| Sample | Reaction time (min) | QPABA ( $\mu$ l) | HAuCl <sub>4</sub> ( $\mu$ l) |
|--------|---------------------|------------------|-------------------------------|
| B0     | 0.5                 | 1000             | 250                           |
| B1     | 5                   | 1000             | 250                           |
| B2     | 10                  | 1000             | 250                           |
| B3     | 15                  | 1000             | 250                           |
| B4     | 20                  | 1000             | 250                           |
| B5     | 25                  | 1000             | 250                           |
| B6     | 30                  | 1000             | 250                           |
| B7     | 35                  | 1000             | 250                           |
| B8     | 40                  | 1000             | 250                           |
| B9     | 45                  | 1000             | 250                           |
| B10    | 60                  | 1000             | 250                           |

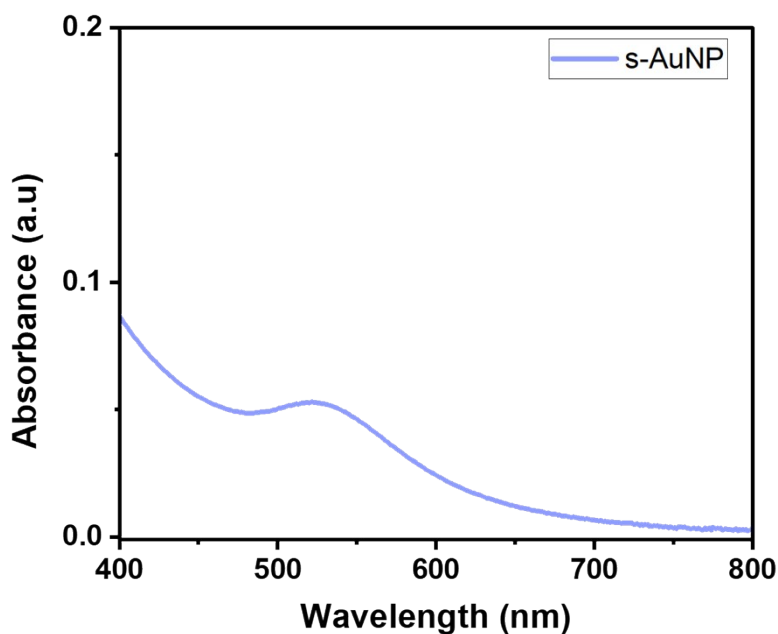

**Figure S3:** UV-Vis of spherical gold nanoparticles using quercetin.

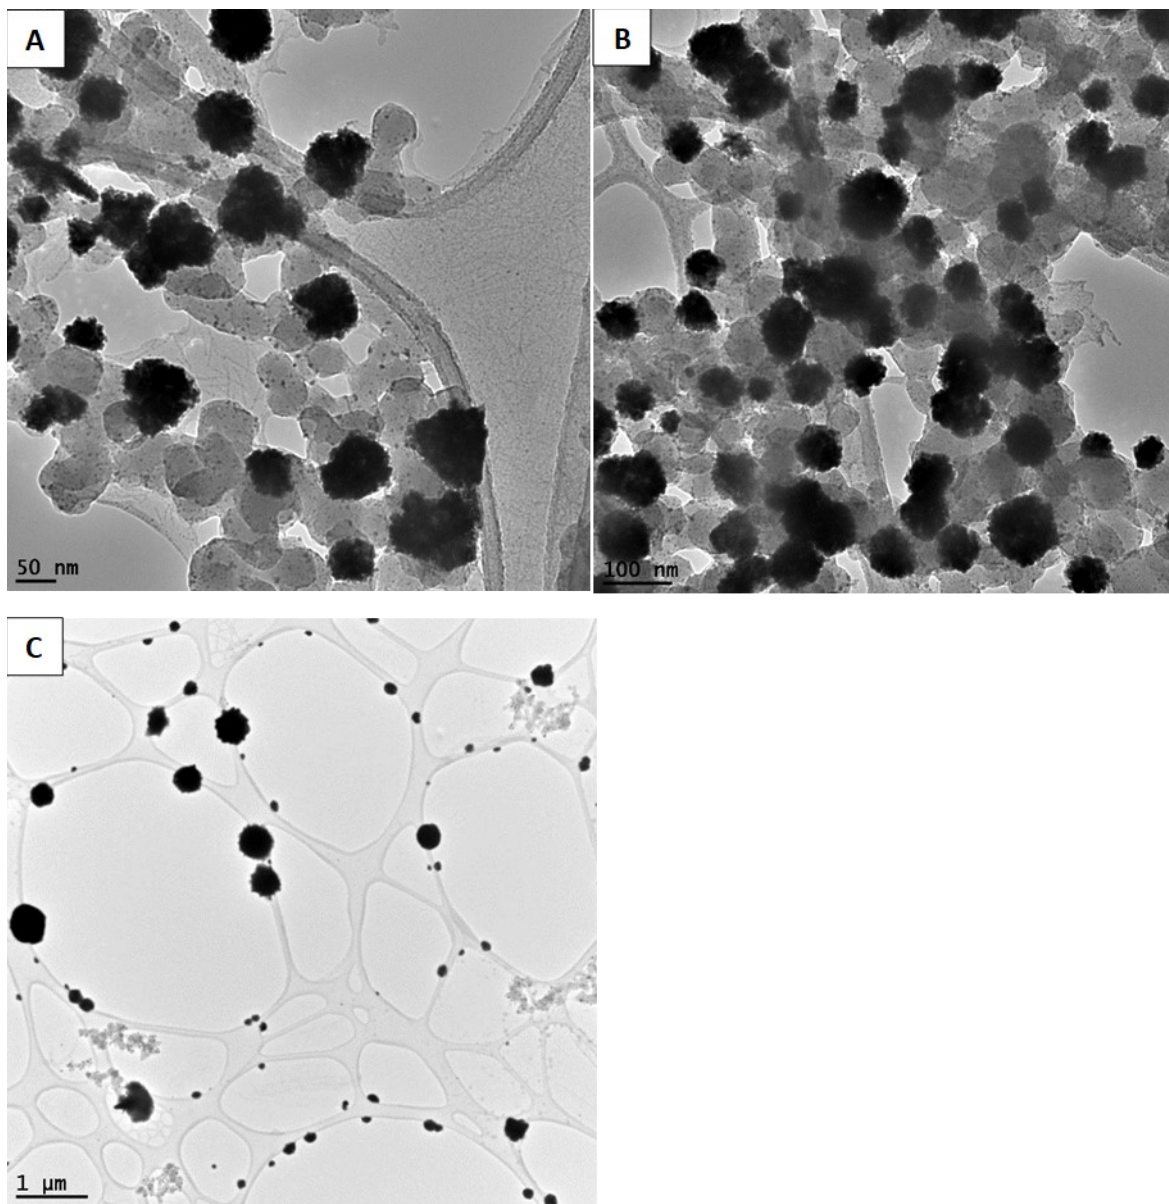

**Figure S4:** TEM images of AuNFs at 50nm (A) ,100 nm (B) and 1 μm ( C).

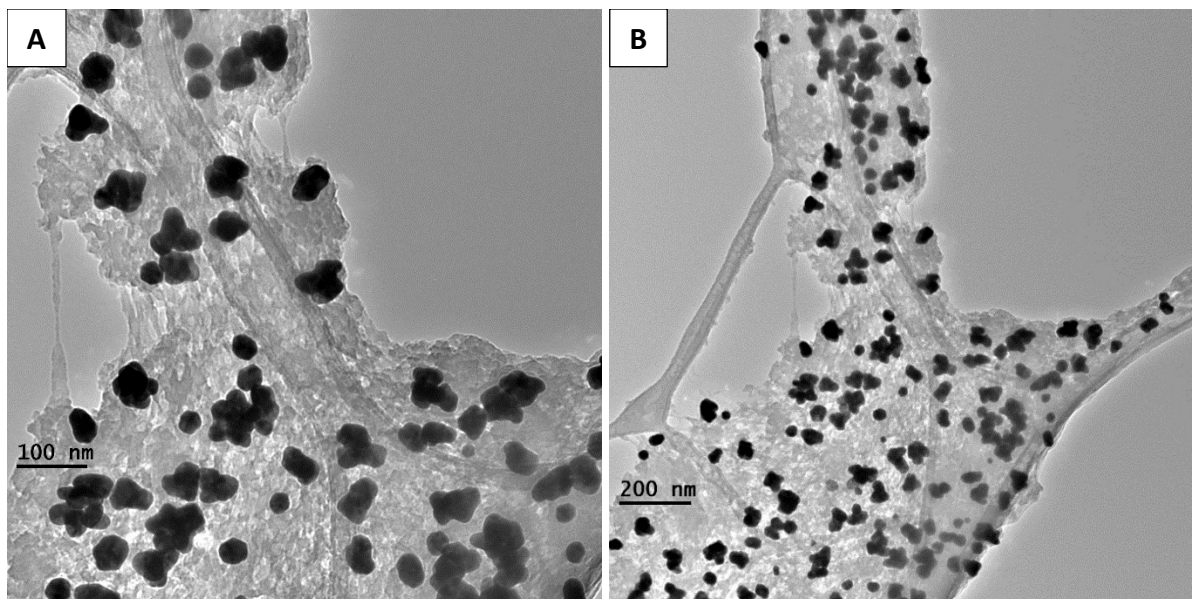

**Figure S5:** TEM images of AuNS at 100nm ( A) and 200 nm (B).

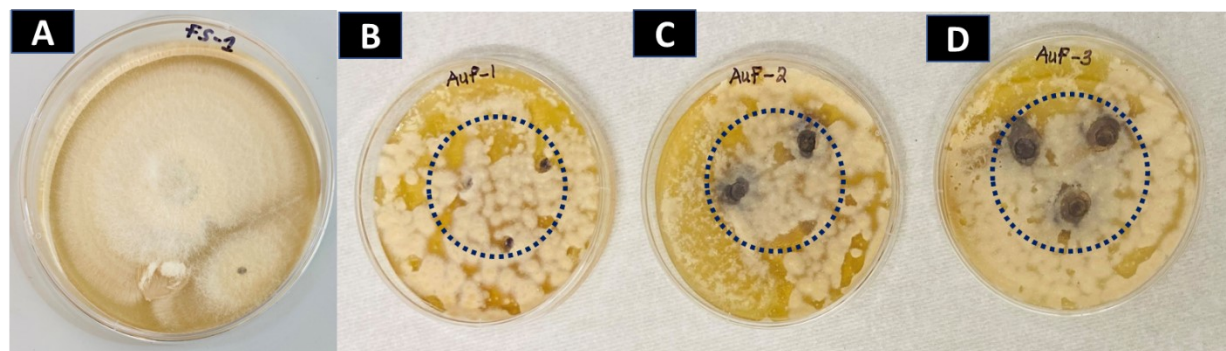

**Figure S6:** Effects of AuNPs on mycelial growth of *Fusarium solani* ssp . Images represent the five days after treatment of AuNFs against *Fusarium solani* spp. (a) control (b); 100 µg/mL (c); 150 µg/mL (d); 200 µg/mL
